# Supplementary material
Source: publisher figshare collection journal article supplement (https://tandf.figshare.com/ndownloader/files/26628504)
Supplement: Supplementary file 1 [file 26628504]

FIGURE A1. Emergency Medical Services calls cluster results from Spatial Scan Statistic (Gini index maximized at 2% risk setting) (36).
